# Supplementary material for: KGML-ag: a modeling framework of knowledge-guided machine learning to simulate agroecosystems: a case study of estimating N 2 O emission using data from mesocosm experiments
Source: Copernicus journal article supplement (doi:10.5194/gmd-15-2839-2022), 2022-04-07
Supplement: Supplementary file 1 [file gmd-15-2839-2022-supplement.pdf]

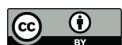

*Supplement of*

**KGML-ag: a modeling framework of knowledge-guided machine learning to simulate agroecosystems: a case study of estimating N<sub>2</sub>O emission using data from mesocosm experiments**

**Licheng Liu et al.**

*Correspondence to:* Zhenong Jin (jinzn@umn.edu)

The copyright of individual parts of the supplement might differ from the article licence.

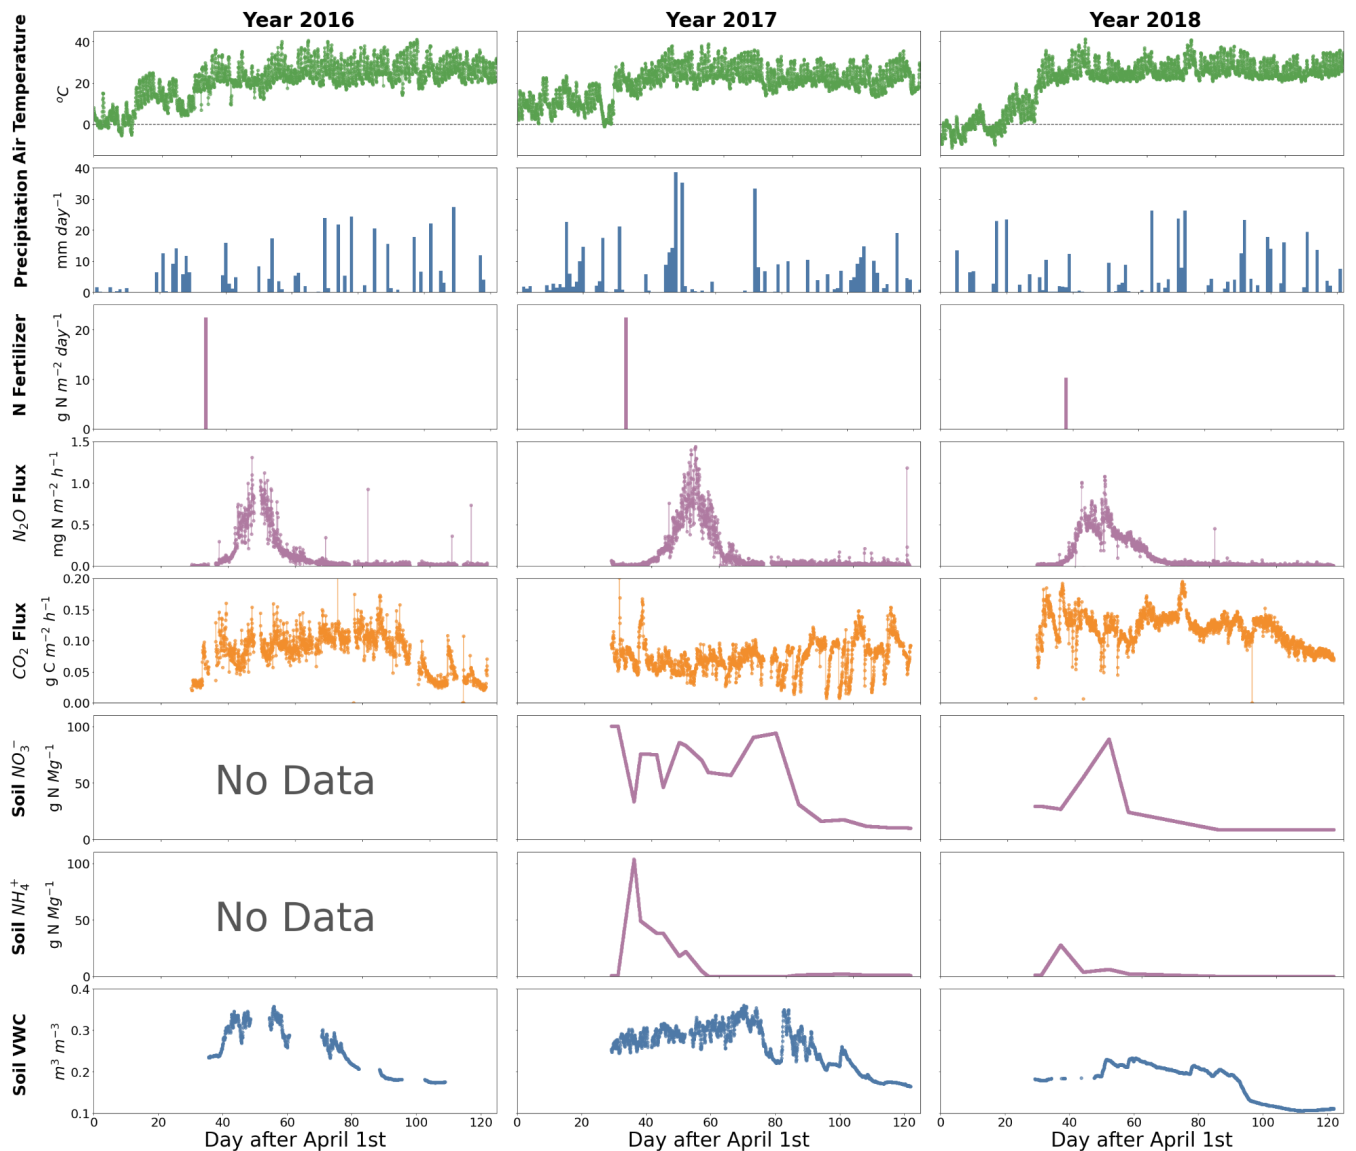

**Figure S1: Time series example of observation data collected from mesocosm chamber 1. The precipitation, N fertilizer, Soil NO<sub>3</sub><sup>-</sup> and NH<sub>4</sub><sup>+</sup> data are in the daily time scale, while other data are in the hourly time scale. Temperature presents in green; water related variables (precipitation and soil VWC) are in blue; N related variables (N fertilizer, N<sub>2</sub>O flux, Soil NO<sub>3</sub><sup>-</sup> and NH<sub>4</sub><sup>+</sup>) are in purple; and CO<sub>2</sub> is in orange. Anomaly points will be down-weighted by daily averaging method with quality check in later processes, which is mentioned in section 2.2.2 last paragraph.**

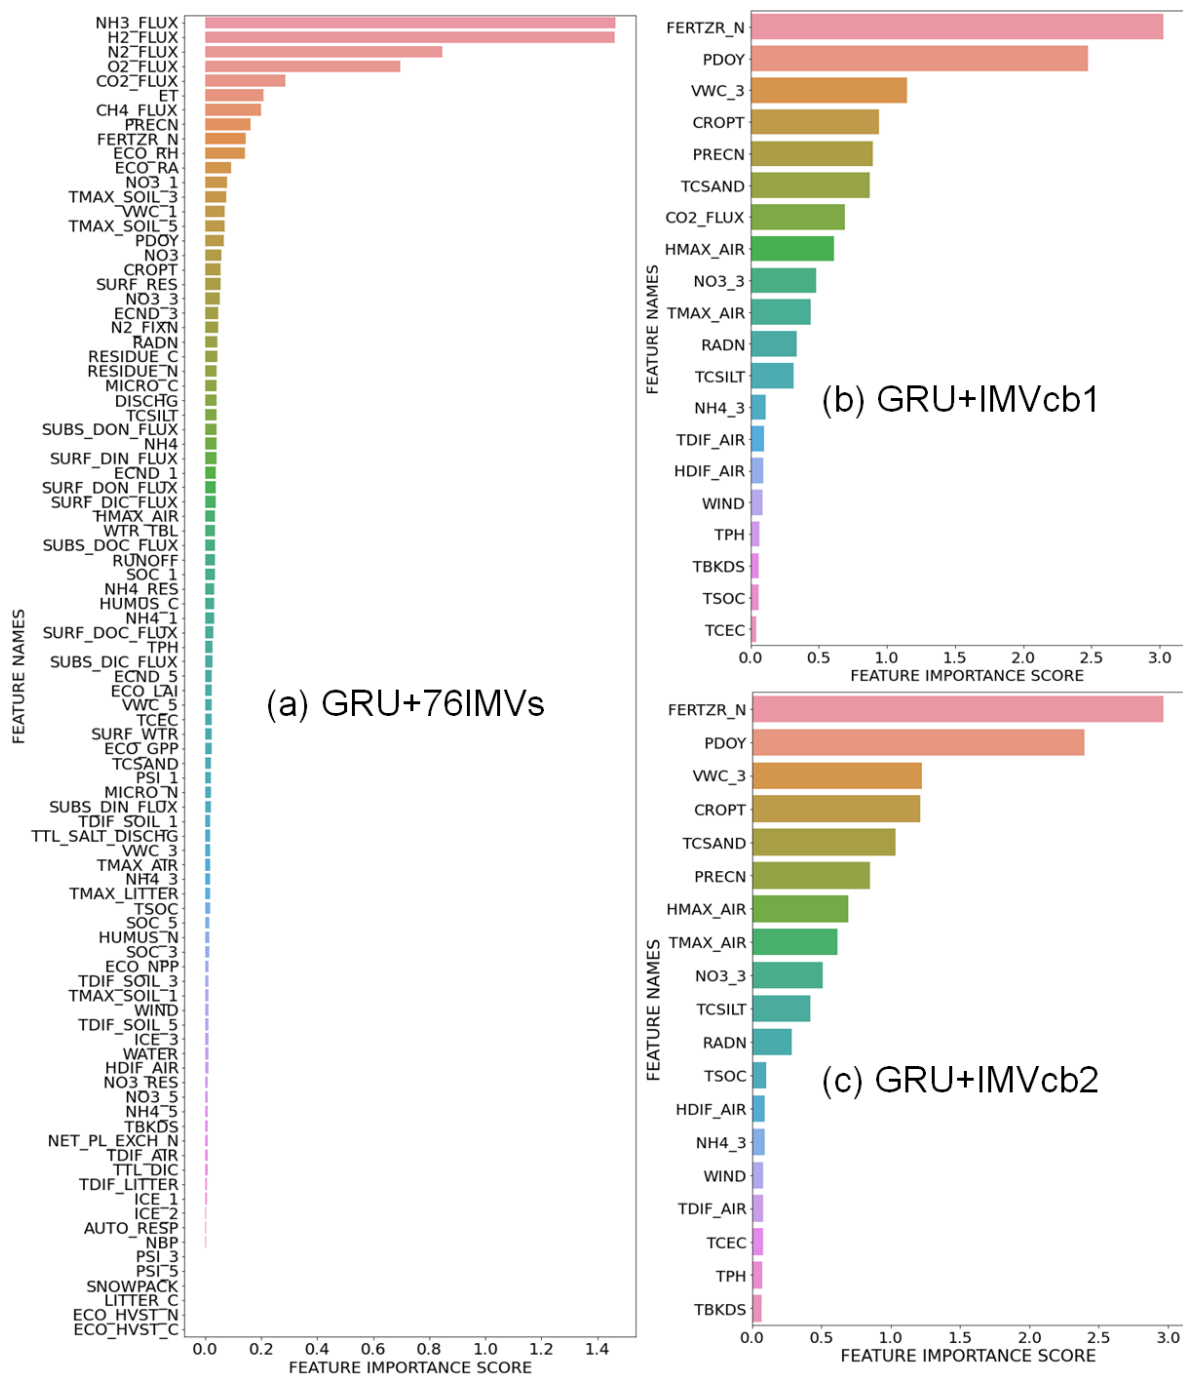

**Figure S2: Feature importance test for intermediate variables (IMVs) with GRU models. To be noticed, the VWC,  $\text{NO}_3^-$ , and  $\text{NH}_4^+$  from third layer soil, which are presented in the main text are abbreviated here as VWC\_3,  $\text{NO}_3_3$ , and  $\text{NH}_4_3$  to be distinguished from the same variables from 1st and 5th layers. Details of the variables can be found in Table S1.**

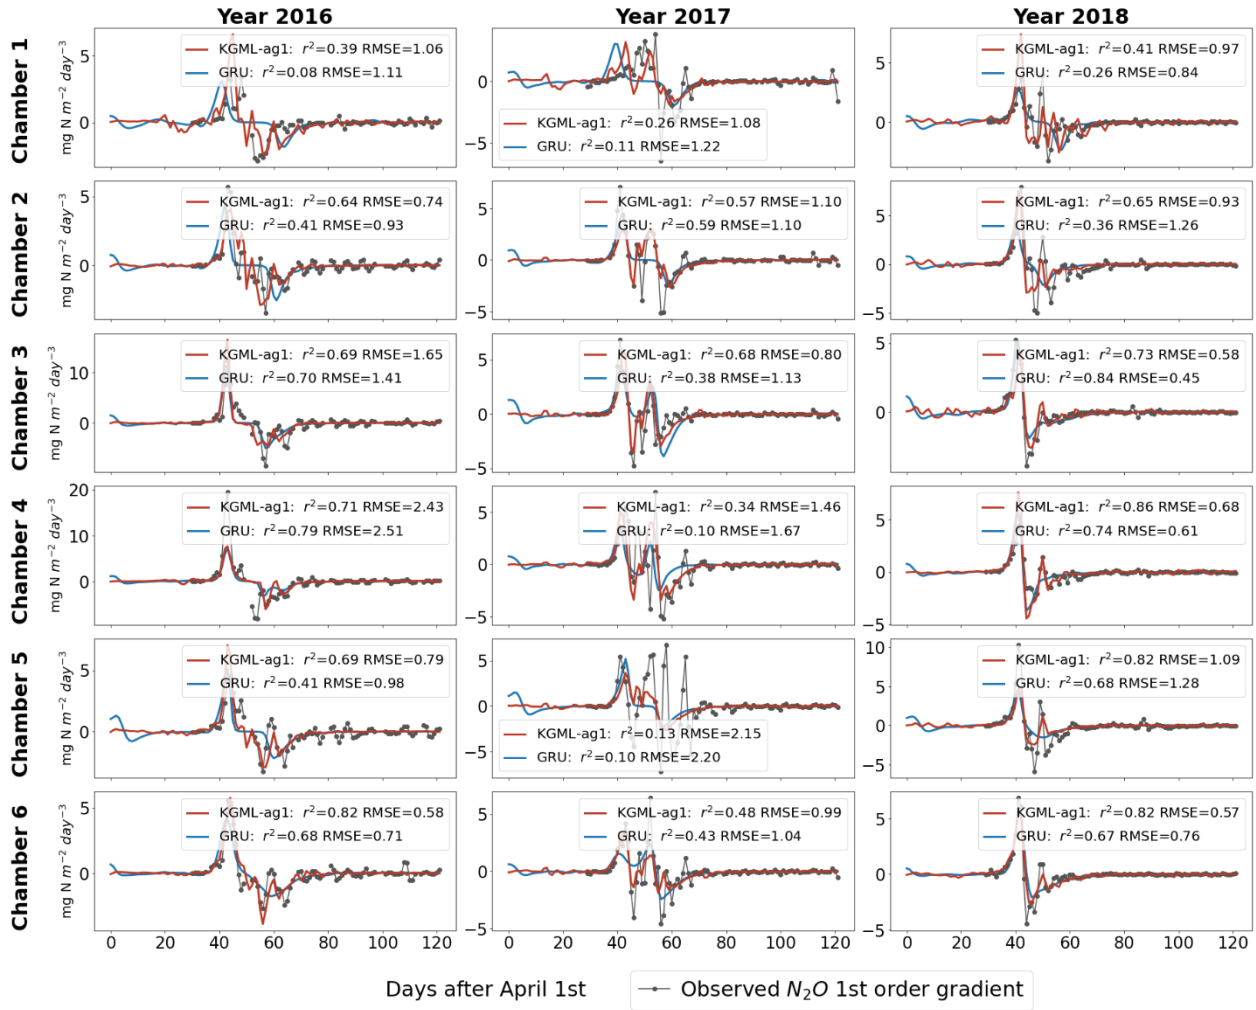

Figure S3:  $N_2O$  flux 1st order gradient time series comparisons between non-pretrained GRU model and KGML-ag1. The black-dot line represents the observation, while blue represents GRU and red represents KGML-ag1.

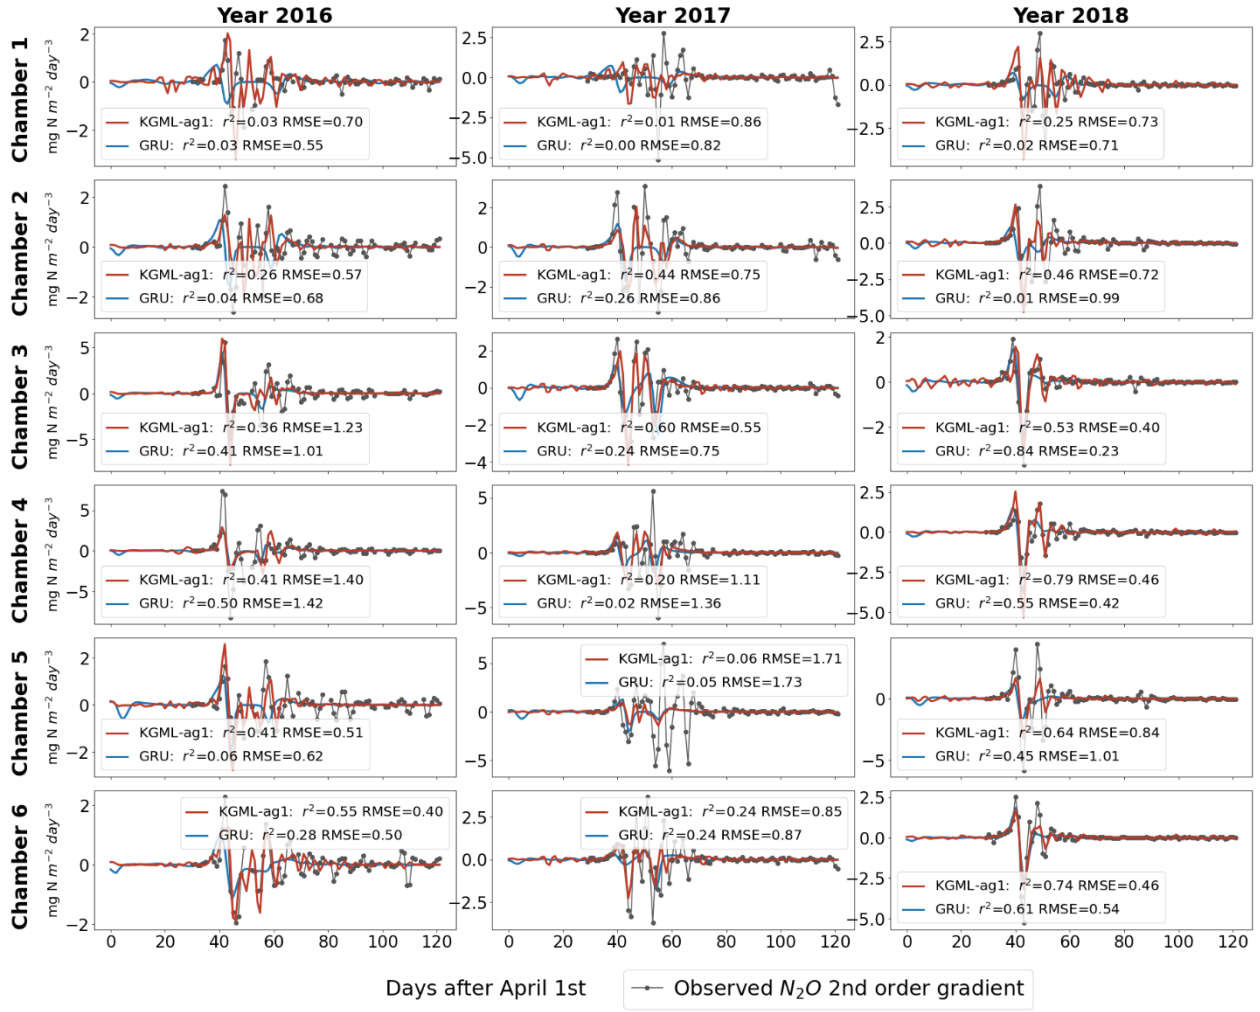

Figure S4:  $N_2O$  flux 2nd order gradient time series comparisons between non-pretrained GRU model and KGML-ag1. The black-dot line represents the observation, while blue represents GRU and red represents KGML-ag1.

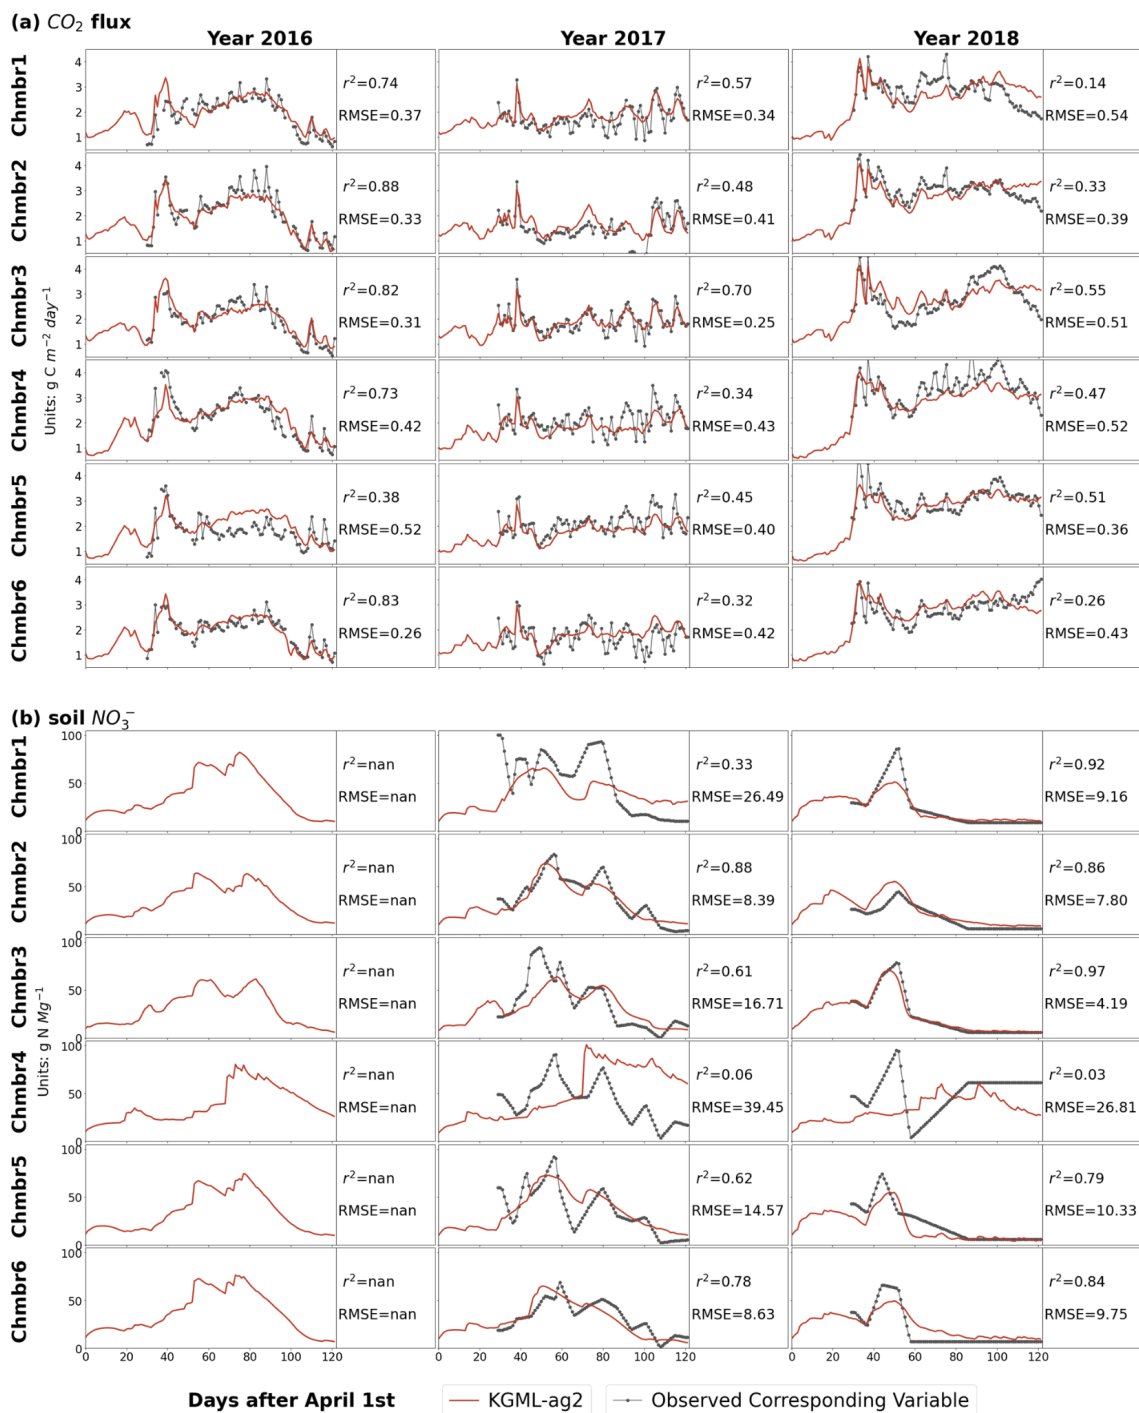

**Figure S5: IMVs prediction from KGML-ag2. The black-dot line represents observations and the red line represents the results from KGML-ag2. Chmb is the abbreviation for chamber.  $r^2$  and RMSE are calculated and present in each year and chamber.**

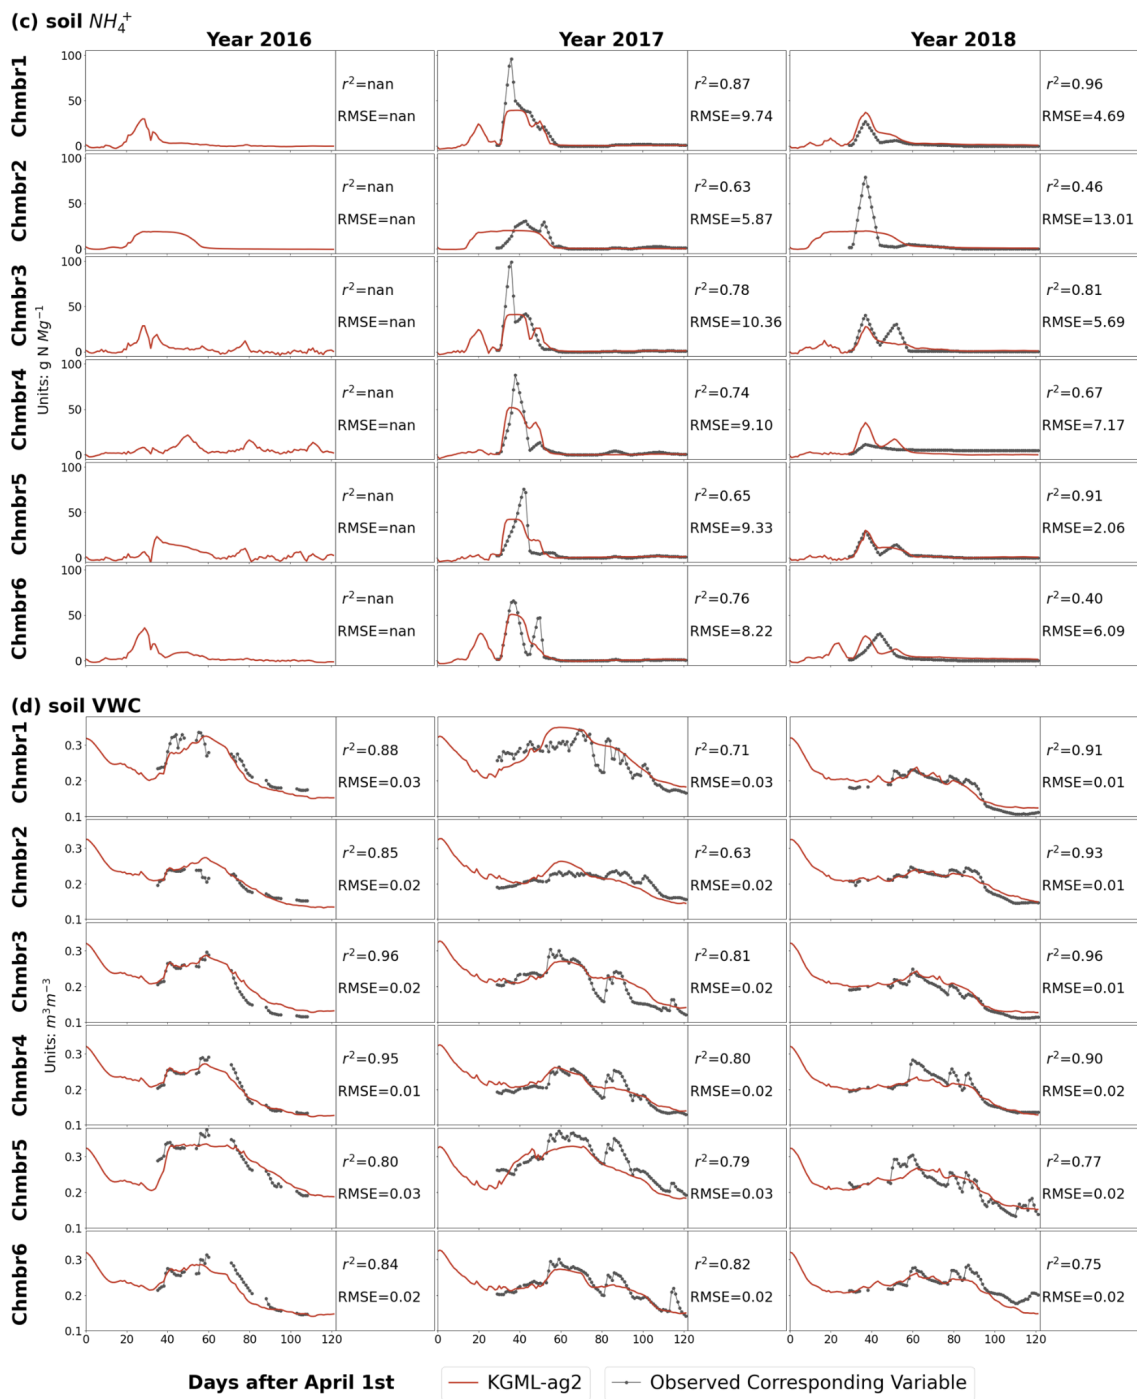

Figure S5 contd.: IMVs prediction from KGML-ag2. The black-dot line represents observations and the red line represents the results from KGML-ag2. Chmb is the abbreviation for chamber.  $r^2$  and RMSE are calculated and present in each year and chamber.

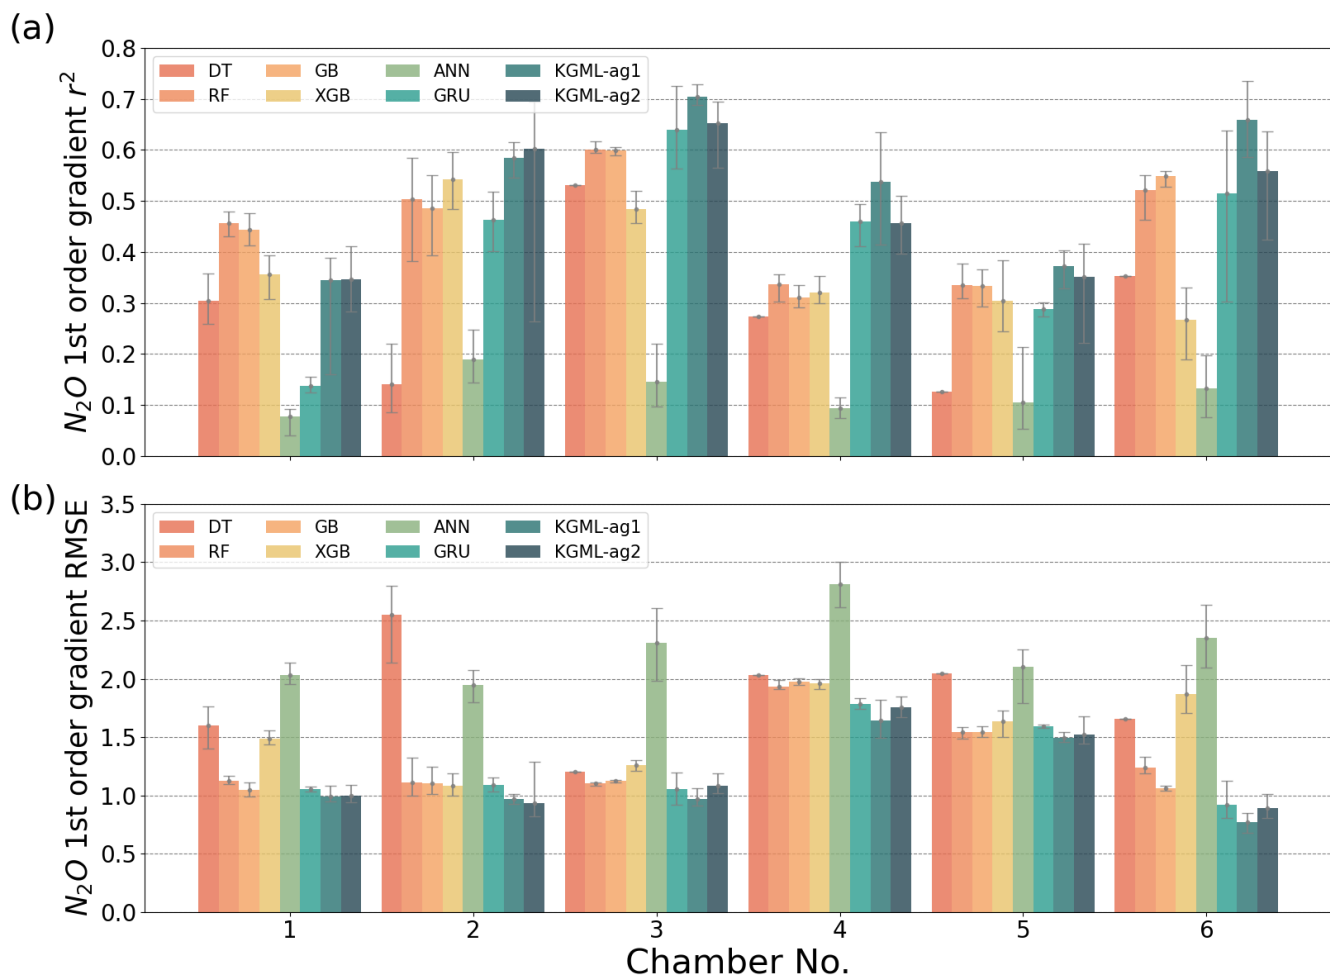

**Figure S6:** The comparisons of  $N_2O$  1st order gradient prediction accuracy  $r^2$  (a) and (b) RMSE, between four tree-based ML models (DT, RF, GB and XGB), two deep learning models (ANN and GRU) and KGML-ag models in 6 chambers. The gray error bars are coming from the maximum and minimum scores of ensemble experiments.

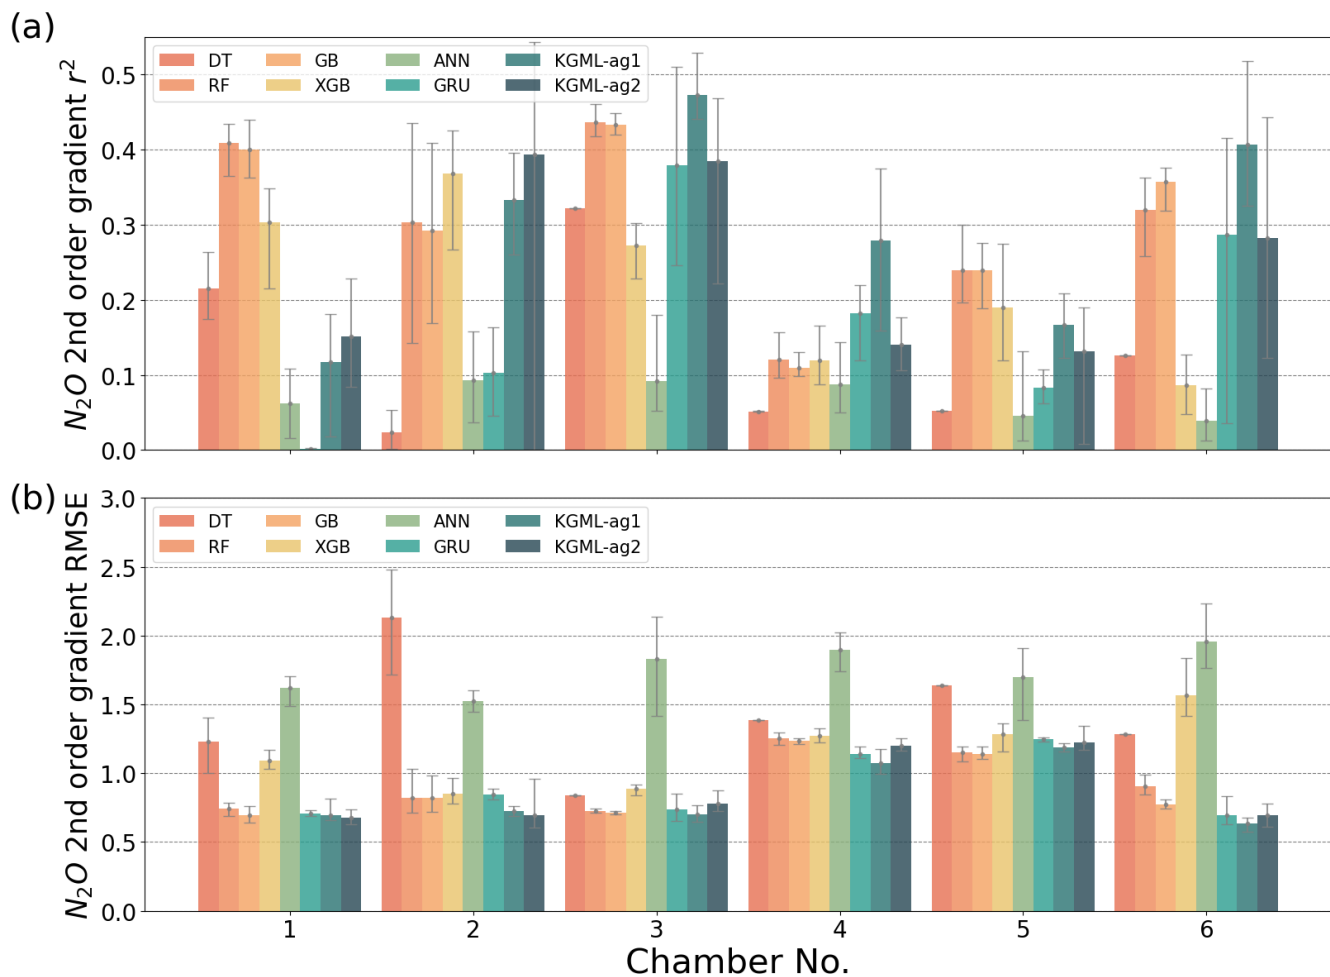

**Figure S7: The comparisons of  $N_2O$  2nd order gradient prediction accuracy  $r^2$  (a) and (b) RMSE, between four tree-based ML models (DT, RF, GB and XGB), two deep learning models (ANN and GRU) and KGML-ag1 model in 6 chambers. The gray error bars are coming from the maximum and minimum scores of ensemble experiments.**

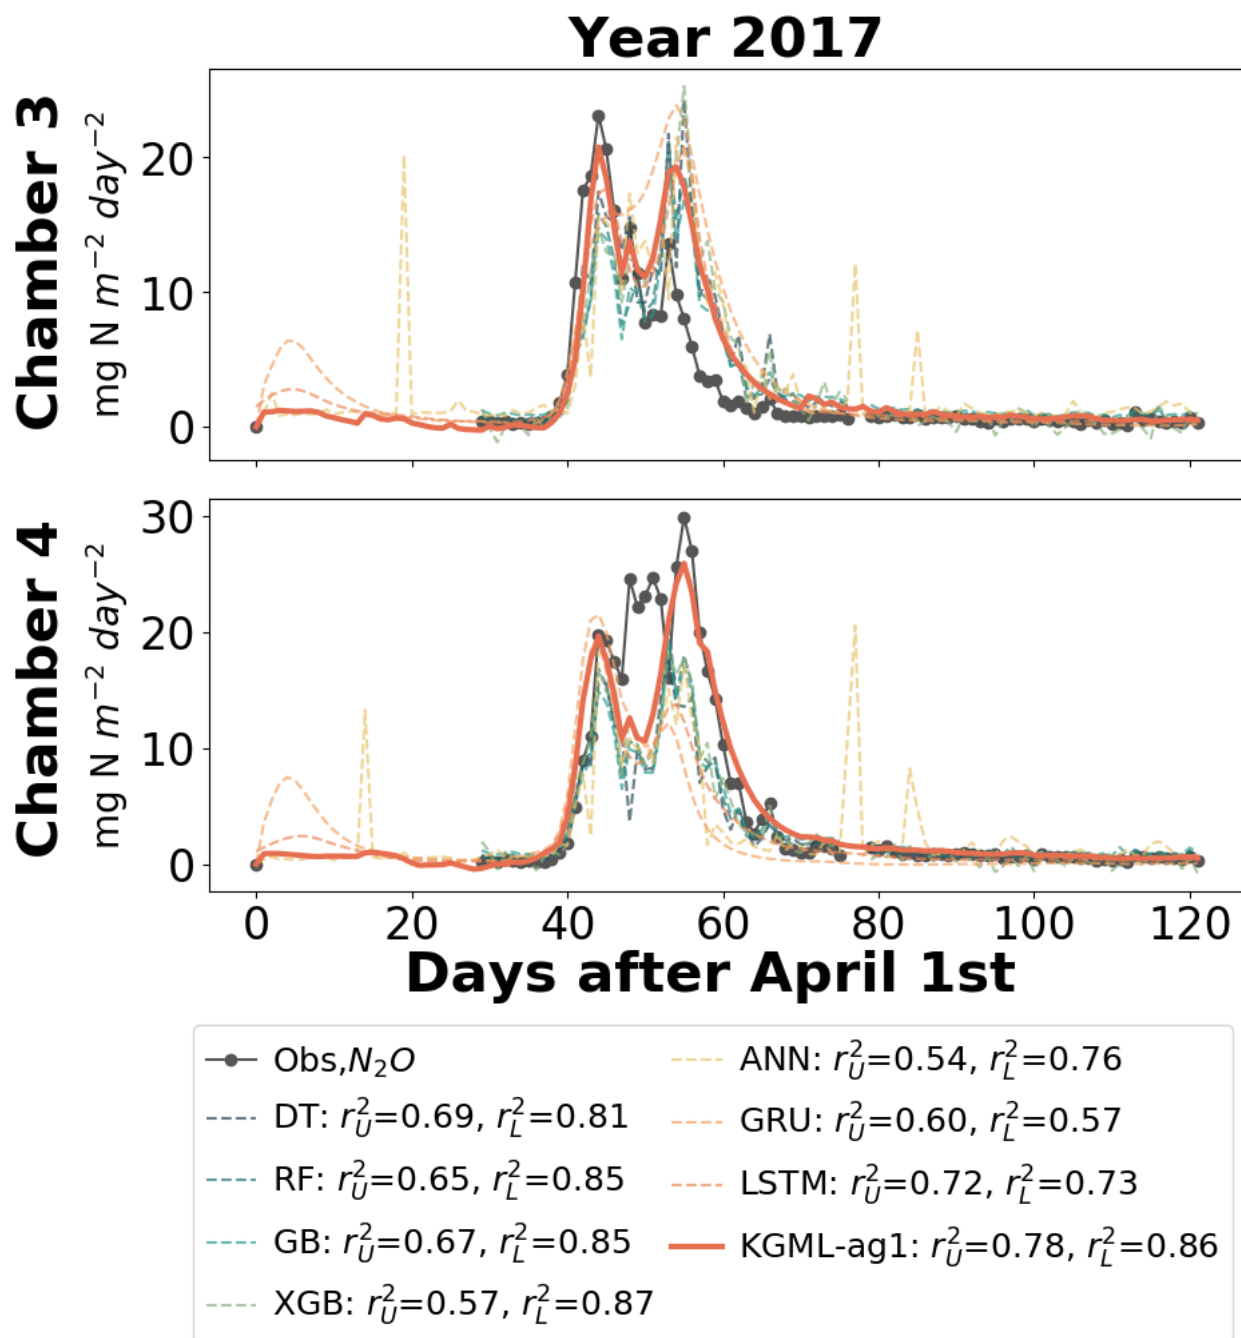

Figure S8:  $N_2O$  flux time series comparisons between KGML-ag1 predictions (red solid line), pure ML models (other colored dashed line) and observations (black-dot line) from cross-validation on two representative panels of chamber 3 and 4 in 2016. The  $r^2$  value was calculated between observations and model simulations.  $r_U^2$  represents the  $r^2$  value from upper panel (chamber 3) and  $r_L^2$  represents the  $r^2$  value from lower panel (chamber 4). The LSTM model has been tested by similar 10 ensemble experiments as GRU. The best LSTM model was chosen to present here compared with other models.

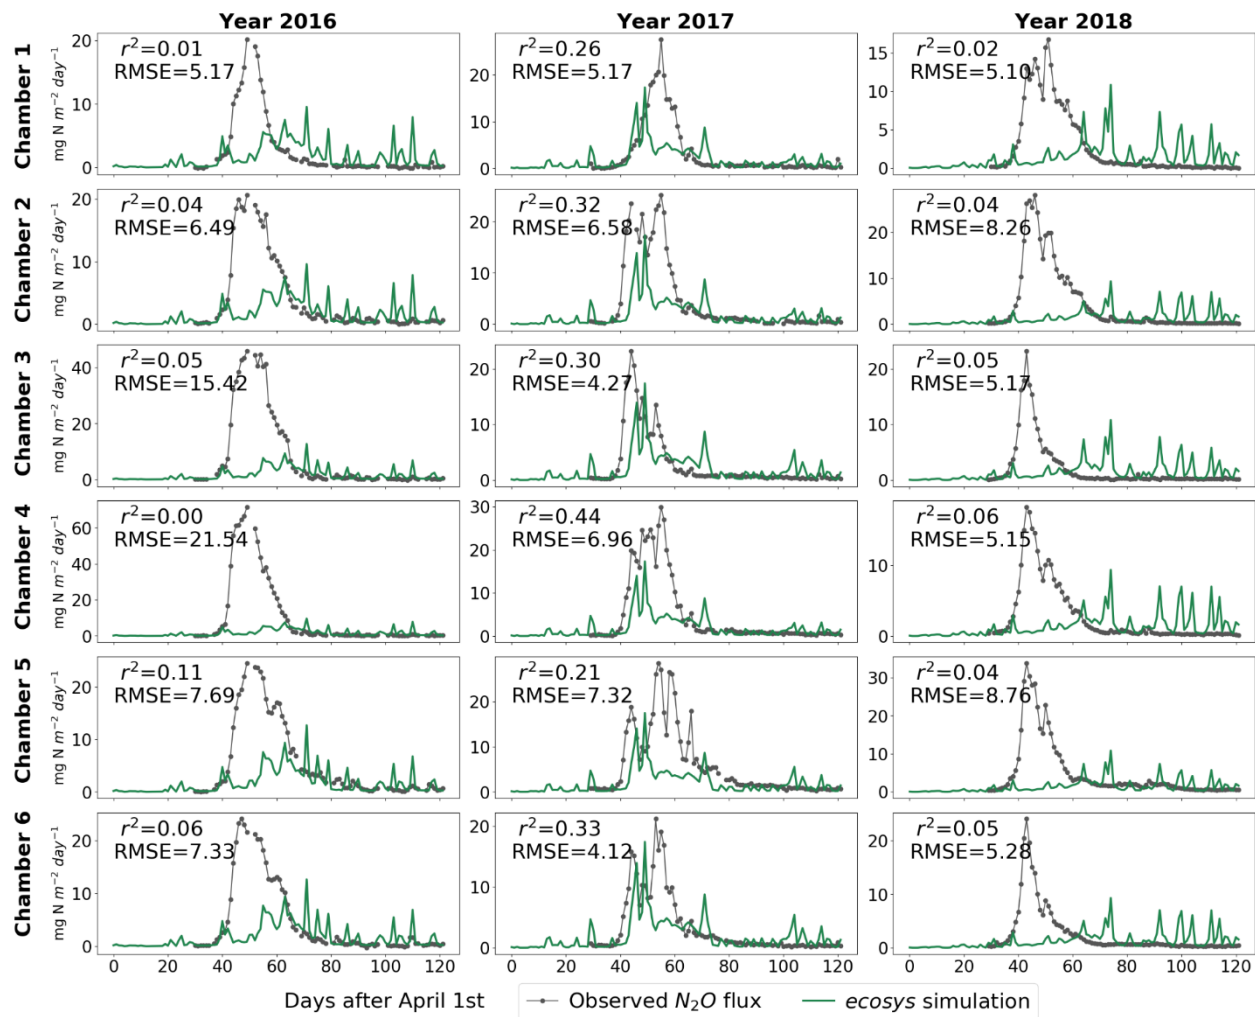

Figure S9:  $N_2O$  flux time series comparisons between *ecosys* simulations (green line) and observations (black-dot line).

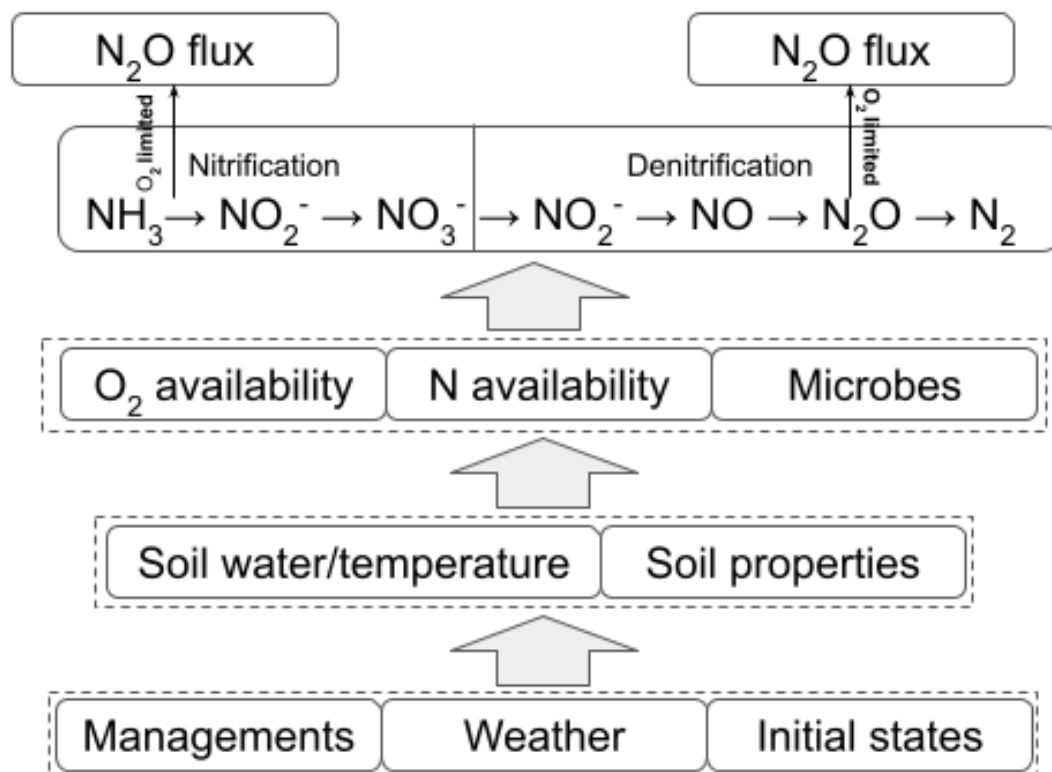

Figure S10: The simplified schema of  $\text{N}_2\text{O}$  flux related variables and processes.

**Table S1: Variable short abbreviation, category (IMV represents intermediate variable, W represents weather forcing, FN represents the N fertilizer rate, SCP represents soil/crop property and target variable), description and units.**

| No. | Abbreviation  | Variable category | Descriptions                                                                      | Units                                          |
|-----|---------------|-------------------|-----------------------------------------------------------------------------------|------------------------------------------------|
| 1   | RESIDUE_C     | IMV               | Total residue C on soil surface and in soil profile                               | $\text{g C m}^{-2}$                            |
| 2   | HUMUS_C       | IMV               | Total particulate + non-particulate C in soil profile                             | $\text{g C m}^{-2}$                            |
| 3   | LITTER_C      | IMV               | C in above + below-ground litterfall                                              | $\text{g C m}^{-2}$                            |
| 4   | CO2_FLUX      | IMV               | CO <sub>2</sub> flux at the soil surface                                          | $\text{g C m}^{-2} \text{ day}^{-1}$           |
| 5   | O2_FLUX       | IMV               | O <sub>2</sub> flux at the soil surface                                           | $\text{g O}_2 \text{ m}^{-2} \text{ day}^{-1}$ |
| 6   | AUTO_RESP     | IMV               | Below-ground autotrophic (root) respiration                                       | $\text{g C m}^{-2} \text{ day}^{-1}$           |
| 7   | MICRO_C       | IMV               | Microbial C in all residue and humus complexes                                    | $\text{g C m}^{-2}$                            |
| 8   | SURF_RES      | IMV               | Residue C on soil surface and in soil profile                                     | $\text{g C m}^{-2}$                            |
| 9   | CH4_FLUX      | IMV               | CH <sub>4</sub> flux at the soil surface                                          | $\text{g C m}^{-2} \text{ day}^{-1}$           |
| 10  | SURF_DOC_FLUX | IMV               | Flux of organic C across all external surface boundaries in runoff and sediment   | $\text{g C m}^{-2} \text{ day}^{-1}$           |
| 11  | SUBS_DOC_FLUX | IMV               | Flux of organic C across all external subsurface boundaries in water discharge    | $\text{g C m}^{-2} \text{ day}^{-1}$           |
| 12  | SURF_DIC_FLUX | IMV               | Flux of inorganic C across all external surface boundaries in runoff and sediment | $\text{g C m}^{-2} \text{ day}^{-1}$           |
| 13  | SUBS_DIC_FLUX | IMV               | Flux of inorganic C across all external subsurface boundaries in water discharge  | $\text{g C m}^{-2} \text{ day}^{-1}$           |
| 14  | NBP           | IMV               | Net biome productivity                                                            | $\text{g C m}^{-2} \text{ day}^{-1}$           |
| 15  | SOC_1         | IMV               | Residue + humus C in soil layer 1, 5cm depth                                      | $\text{g C m}^{-2}$                            |
| 16  | SOC_3         | IMV               | Residue + humus C in soil layer 3, 15cm depth                                     | $\text{g C m}^{-2}$                            |
| 17  | SOC_5         | IMV               | Residue + humus C in soil layer 5, 28cm depth                                     | $\text{g C m}^{-2}$                            |
| 18  | H2_FLUX       | IMV               | H <sub>2</sub> flux at the soil surface                                           | $\text{g H}_2 \text{ m}^{-2} \text{ day}^{-1}$ |
| 19  | ECO_HVST_C    | IMV               | C removed in harvest                                                              | $\text{g C m}^{-2}$                            |
| 20  | ECO_LAI       | IMV               | Leaf area index                                                                   | $\text{m}^2 \text{ m}^{-2}$                    |
| 21  | ECO_GPP       | IMV               | Gross primary productivity                                                        | $\text{g C m}^{-2} \text{ day}^{-1}$           |
| 22  | ECO_RA        | IMV               | Autotrophic respiration                                                           | $\text{g C m}^{-2} \text{ day}^{-1}$           |
| 23  | ECO_NPP       | IMV               | Net primary productivity                                                          | $\text{g C m}^{-2} \text{ day}^{-1}$           |
| 24  | ECO_RH        | IMV               | Heterotrophic respiration                                                         | $\text{g C m}^{-2} \text{ day}^{-1}$           |
| 25  | TTL_DIC       | IMV               | Total stocks of dissolved inorganic C                                             | $\text{g C m}^{-2}$                            |
| 26  | ET            | IMV               | Evapotranspiration rate                                                           | $\text{mm day}^{-1}$                           |
| 27  | RUNOFF        | IMV               | Overland surface flow                                                             | $\text{mm day}^{-1}$                           |
| 28  | WATER         | IMV               | The total amount of water in the rooting zone of the soil profile                 | $\text{mm day}^{-1}$                           |
| 29  | DISCHG        | IMV               | Water discharge flux through all subsurface boundaries                            | mm                                             |
| 30  | SNOWPACK      | IMV               | The equivalent water content of snow + ice + water in the snowpack                | mm                                             |
| 31  | VWC_1         | IMV               | The volumetric water content in soil layer 1, 5cm depth                           | $\text{m}^3 \text{ m}^{-3}$                    |
| 32  | VWC_3         | IMV               | The volumetric water content in soil layer 3, 15cm depth                          | $\text{m}^3 \text{ m}^{-3}$                    |
| 33  | VWC_5         | IMV               | The volumetric water content in soil layer 5, 28cm depth                          | $\text{m}^3 \text{ m}^{-3}$                    |

|    |               |                 |                                                                                           |                                     |
|----|---------------|-----------------|-------------------------------------------------------------------------------------------|-------------------------------------|
| 34 | SURF_WTR      | IMV             | Near surface volumetric water content                                                     | $\text{m}^3 \text{m}^{-3}$          |
| 35 | ICE_1         | IMV             | The volumetric ice content in soil layer 1, 5cm depth                                     | $\text{m}^3 \text{m}^{-3}$          |
| 36 | ICE_2         | IMV             | The volumetric ice content in soil layer 3, 15cm depth                                    | $\text{m}^3 \text{m}^{-3}$          |
| 37 | ICE_3         | IMV             | The volumetric icecontent in soil layer 5, 28cm depth                                     | $\text{m}^3 \text{m}^{-3}$          |
| 38 | PSI_1         | IMV             | The matric water potential in soil layer 1, 5cm depth                                     | Mpa                                 |
| 39 | PSI_3         | IMV             | The matric water potential in soil layer 3, 15cm depth                                    | Mpa                                 |
| 40 | PSI_5         | IMV             | The matric water potential in soil layer 5, 28cm depth                                    | Mpa                                 |
| 41 | WTR_TBL       | IMV             | Depth of the water table from the surface                                                 | m                                   |
| 42 | RESIDUE_N     | IMV             | Total residue N on soil surface and in soil profile                                       | $\text{g N m}^{-2}$                 |
| 43 | HUMUS_N       | IMV             | Total particulate + non-particulate N in soil profile                                     | $\text{g N m}^{-2}$                 |
| 44 | FERTZR_N      | FN              | N fertilizer applied                                                                      | $\text{g N m}^{-2}$                 |
| 45 | NET_PL_EXCH_N | IMV             | Net N exchange between soil and plants                                                    | $\text{g N m}^{-2} \text{day}^{-1}$ |
| 46 | NH4           | IMV             | Total $\text{NH}_4^+ + \text{NH}_3$ in the soil profile                                   | $\text{g N m}^{-2}$                 |
| 47 | NO3           | IMV             | Total $\text{NO}_3^-$ in soil profile                                                     | $\text{g N m}^{-2}$                 |
| 48 | SURF_DON_FLUX | IMV             | Flux of organic N across all external surface boundaries in runoff and sediment           | $\text{g N m}^{-2} \text{day}^{-1}$ |
| 49 | SUBS_DON_FLUX | IMV             | Flux of organic N across all external subsurface boundaries in water discharge            | $\text{g N m}^{-2} \text{day}^{-1}$ |
| 50 | SURF_DIN_FLUX | IMV             | Flux of inorganic N across all external surface boundaries in runoff and sediment         | $\text{g N m}^{-2} \text{day}^{-1}$ |
| 51 | SUBS_DIN_FLUX | IMV             | Flux of inorganic N across all external subsurface boundaries in water discharge          | $\text{g N m}^{-2} \text{day}^{-1}$ |
| 52 | N2O_FLUX      | Target variable | $\text{N}_2\text{O}$ flux at the soil surface                                             | $\text{g N m}^{-2} \text{day}^{-1}$ |
| 53 | NH3_FLUX      | IMV             | $\text{NH}_3$ flux at soil and plant surfaces                                             | $\text{g N m}^{-2} \text{day}^{-1}$ |
| 54 | N2_FIXN       | IMV             | Aerobic + anaerobic non-symbiotic $\text{N}_2$ fixation + symbiotic $\text{N}_2$ fixation | $\text{g N m}^{-2} \text{day}^{-1}$ |
| 55 | MICRO_N       | IMV             | Total microbial N in all residue and humus complexes                                      | $\text{g N m}^{-2}$                 |
| 56 | NH4_1         | IMV             | Total $\text{NH}_4^+ + \text{NH}_3$ concentration in soil layer 1, 5cm depth              | $\text{g N m}^{-2}$                 |
| 57 | NH4_3         | IMV             | Total $\text{NH}_4^+ + \text{NH}_3$ concentration in soil layer 3, 15cm depth             | $\text{g N m}^{-2}$                 |
| 58 | NH4_5         | IMV             | Total $\text{NH}_4^+ + \text{NH}_3$ concentration in soil layer 5, 28cm depth             | $\text{g N m}^{-2}$                 |
| 59 | NO3_1         | IMV             | Total $\text{NO}_3^- + \text{NO}_2^-$ concentration in soil layer 1, 5cm depth            | $\text{g N m}^{-2}$                 |
| 60 | NO3_3         | IMV             | Total $\text{NO}_3^- + \text{NO}_2^-$ concentration in soil layer 3, 15cm depth           | $\text{g N m}^{-2}$                 |
| 61 | NO3_5         | IMV             | Total $\text{NO}_3^- + \text{NO}_2^-$ concentration in soil layer 5, 28cm depth           | $\text{g N m}^{-2}$                 |
| 62 | NH4_RES       | IMV             | Residue $\text{NH}_4^+ + \text{NH}_3$ on soil surface and in soil profile                 | $\text{g N m}^{-2}$                 |
| 63 | NO3_RES       | IMV             | Residue $\text{NO}_3^- + \text{NO}_2^-$ on soil surface and in soil profile               | $\text{g N m}^{-2}$                 |
| 64 | ECO_HVST_N    | IMV             | N removed in harvest                                                                      | $\text{g N m}^{-2} \text{day}^{-1}$ |
| 65 | N2_FLUX       | IMV             | $\text{N}_2$ flux at the soil surface                                                     | $\text{g N m}^{-2} \text{day}^{-1}$ |
| 66 | RADN          | W               | Solar Radiation                                                                           | $\text{W m}^{-2}$                   |
| 67 | TMAX_AIR      | W               | Max air temperature                                                                       | $^{\circ}\text{C}$                  |
| 68 | TDIF_AIR      | W               | Difference between max and min air temperature                                            | $^{\circ}\text{C}$                  |
| 69 | HMAX_AIR      | W               | Max humidity                                                                              | fraction                            |
| 70 | HDIF_AIR      | W               | Difference between max and min humidity                                                   | fraction                            |

|    |                 |     |                                                                                           |                                     |
|----|-----------------|-----|-------------------------------------------------------------------------------------------|-------------------------------------|
| 71 | WIND            | W   | Wind speed                                                                                | $\text{m s}^{-1}$                   |
| 72 | PRECN           | W   | Precipitation                                                                             | $\text{mm day}^{-1}$                |
| 73 | TMAX_SOIL_1     | IMV | The maximum temperature in soil layer 1, 5cm depth                                        | $^{\circ}\text{C}$                  |
| 74 | TDIF_SOIL_1     | IMV | The difference between max and min temperature<br>temperature in soil layer 1 , 5cm depth | $^{\circ}\text{C}$                  |
| 75 | TMAX_SOIL_3     | IMV | The maximum temperature in soil layer 3, 15cm depth                                       | $^{\circ}\text{C}$                  |
| 76 | TDIF_SOIL_3     | IMV | The difference between max and min temperature<br>temperature in soil layer 3, 15cm depth | $^{\circ}\text{C}$                  |
| 77 | TMAX_SOIL_5     | IMV | The maximum temperature in soil layer 5, 28cm depth                                       | $^{\circ}\text{C}$                  |
| 78 | TDIF_SOIL_5     | IMV | The difference between max and min temperature<br>temperature in soil layer 5, 28cm depth | $^{\circ}\text{C}$                  |
| 79 | TMAX_LITTER     | IMV | The maximum temperature in litter                                                         | $^{\circ}\text{C}$                  |
| 80 | TDIF_LITTER     | IMV | The difference between max and min temperature<br>temperature in litter                   | $^{\circ}\text{C}$                  |
| 81 | ECND_1          | IMV | Electrical conductivity in soil layer 1, 5cm depth                                        | $\text{dS m}^{-1}$                  |
| 82 | ECND_3          | IMV | Electrical conductivity in soil layer 3, 15cm depth                                       | $\text{dS m}^{-1}$                  |
| 83 | ECND_5          | IMV | Electrical conductivity in soil layer 5, 28cm depth                                       | $\text{dS m}^{-1}$                  |
| 84 | TTL_SALT_DISCHG | IMV | Total salt discharge through water through all subsurface<br>boundaries                   | $\text{g Mg}^{-1} \text{ day}^{-1}$ |
| 85 | PDOY            | SCP | Plant day of the year                                                                     | day                                 |
| 86 | CROPT           | SCP | Crop type, 1 for corn and 0 for soybean                                                   | unitless                            |
| 87 | TBKDS           | SCP | Depth weighted averaged bulk density in soil profile                                      | $\text{Mg m}^{-3}$                  |
| 88 | TCSAND          | SCP | Depth weighted averaged sand content in soil profile                                      | $\text{g kg}^{-1}$                  |
| 89 | TCSILT          | SCP | Depth weighted averaged silt content in soil profile                                      | $\text{g kg}^{-1}$                  |
| 90 | TPH             | SCP | Depth weighted averaged pH in soil profile                                                | unitless                            |
| 91 | TCEC            | SCP | Depth weighted averaged $\text{cmol}^{+} \text{ kg}^{-1}$ in soil profile                 | $\text{cmol}^{-1} \text{ kg}^{-1}$  |
| 92 | TSOC            | SCP | Depth weighted averaged soil organic carbon in soil profile                               | $\text{g C kg}^{-1}$                |

---

**Table S2: N<sub>2</sub>O prediction accuracy comparisons between LSTM and GRU models on synthetic data, with different combinations of IMVs (+9 or +58IMVs) and different sliding window settings during training (e.g. 2y1y represent window size is 2 years and the window move 1 year after 1 iteration). Training Efficiency is also compared between LSTM and GRU models for the first two experiments, with changing the training counties = 3, 10, 30, 70, validation counties = 1, 2, 5, 10, and batch size (county numbers input in each iteration) = 1, 5, 5, 5, 5.**

| Experiment settings | N <sub>2</sub> O prediction accuracy |           | Training efficiency         |                              |                              |                               |
|---------------------|--------------------------------------|-----------|-----------------------------|------------------------------|------------------------------|-------------------------------|
|                     | Test r <sup>2</sup>                  | Test RMSE | Train=3, val=1,<br>batch =1 | Train=10, val=2,<br>batch =5 | Train=30, val=5,<br>batch =5 | Train=70, val=10,<br>batch =5 |
| LSTM+9IMVs+1y1y     | 0.74                                 | 1.32      | 3.8s                        | 3.3s                         | 9.2s                         | 22s                           |
| GRU+9IMVs+1y1y      | 0.81                                 | 1.08      | 3.5s                        | 2.7s                         | 7.2s                         | 17s                           |
| LSTM+58IMVs+1y1y    | 0.91                                 | 0.6       |                             |                              |                              |                               |
| GRU+58IMVs+1y1y     | 0.92                                 | 0.59      |                             |                              |                              |                               |
| LSTM+58IMVs+2y2y    | 0.86                                 | 0.76      |                             |                              |                              |                               |
| GRU+58IMVs+2y2y     | 0.9                                  | 0.66      |                             |                              |                              |                               |
| LSTM+58IMVs+2y1y    | 0.89                                 | 0.67      |                             |                              |                              |                               |
| GRU+58IMVs+2y1y     | 0.91                                 | 0.6       |                             |                              |                              |                               |
